# Supplementary material for: Modulating chelation with pH sensitivity for controlled structural defects and enhanced electrochemical and photocatalytic activities of LDH films
Source: Royal Society of Chemistry journal article supplement (doi:10.1039/d3ta06840d), 2024-01-01
Supplement: d3ta06840d1.pdf [file d3ta06840d1.pdf]

**Supplementary information to**

**Modulating Chelation with pH Sensitivity for Controlled Structural Defects  
and Enhanced Electrochemical and Photocatalytic activities of LDH films**

Muhammad Ali Khan, Ananda Repycha Safira, Mosab Kaseem\*

Corrosion and Electrochemistry Laboratory, Department of Nanotechnology and Advanced  
Materials Engineering, Sejong University, Seoul 05006, Republic of Korea

\*Corresponding author Email: [mosabkaseem@sejong.ac.kr](mailto:mosabkaseem@sejong.ac.kr) (M. Kaseem)

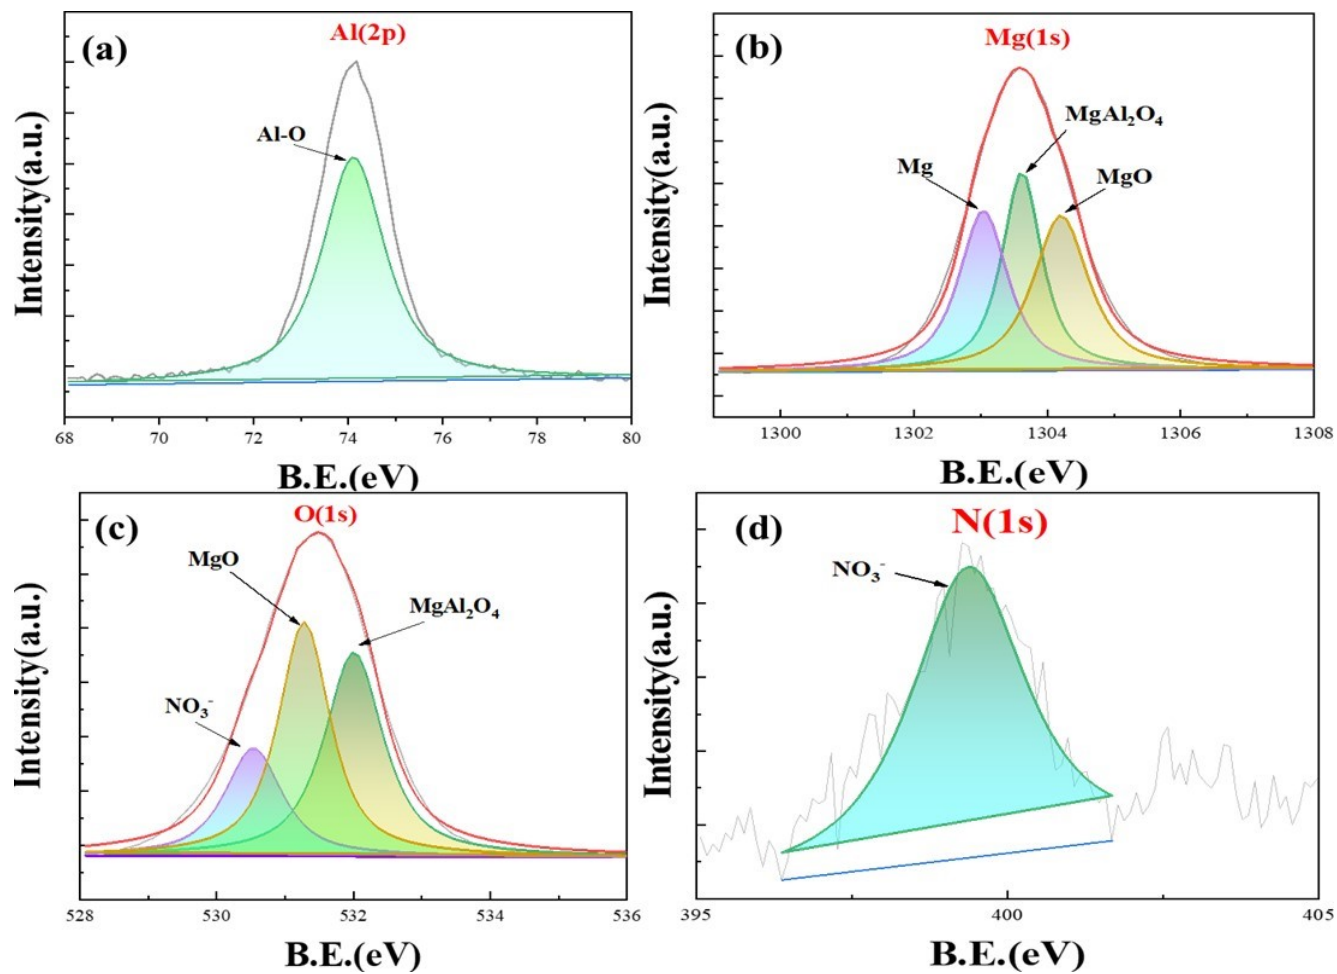

Fig.S1.High-resolution XPS spectra (a). PEO film for Al(2p), (b), LDH film for Mg(1s), O(1s) and N(1s).

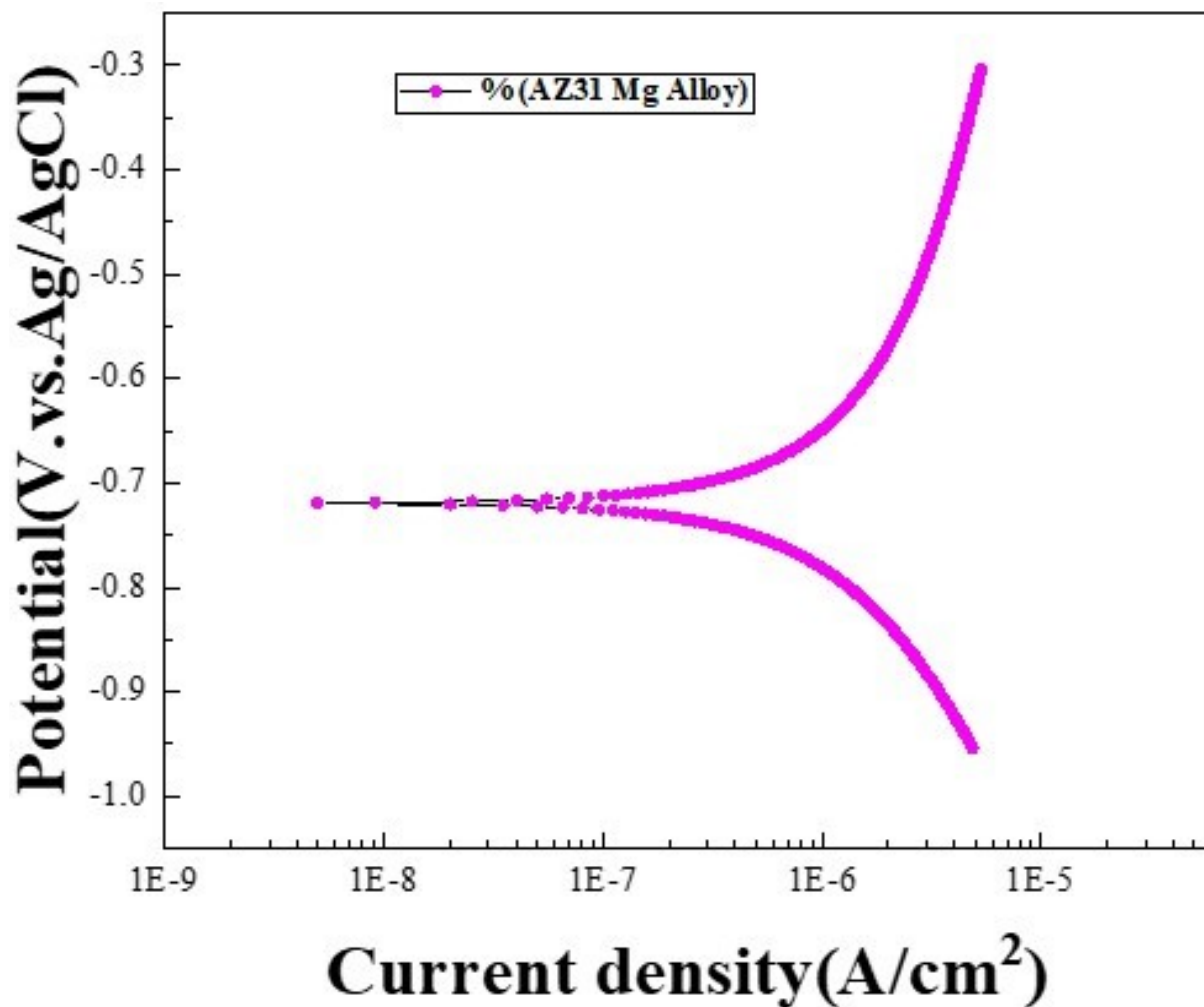

Fig.S2. The potentiodynamic polarization curve for AZ31 alloy after immersion for 5 hours in 3.5% NaCl Solution. The value of  $I_{\text{corr}}$  is  $1.18 \times 10^{-6} \text{ A/cm}^2$  and the value of  $E_{\text{corr}}$  is around -0.7 V/decade.

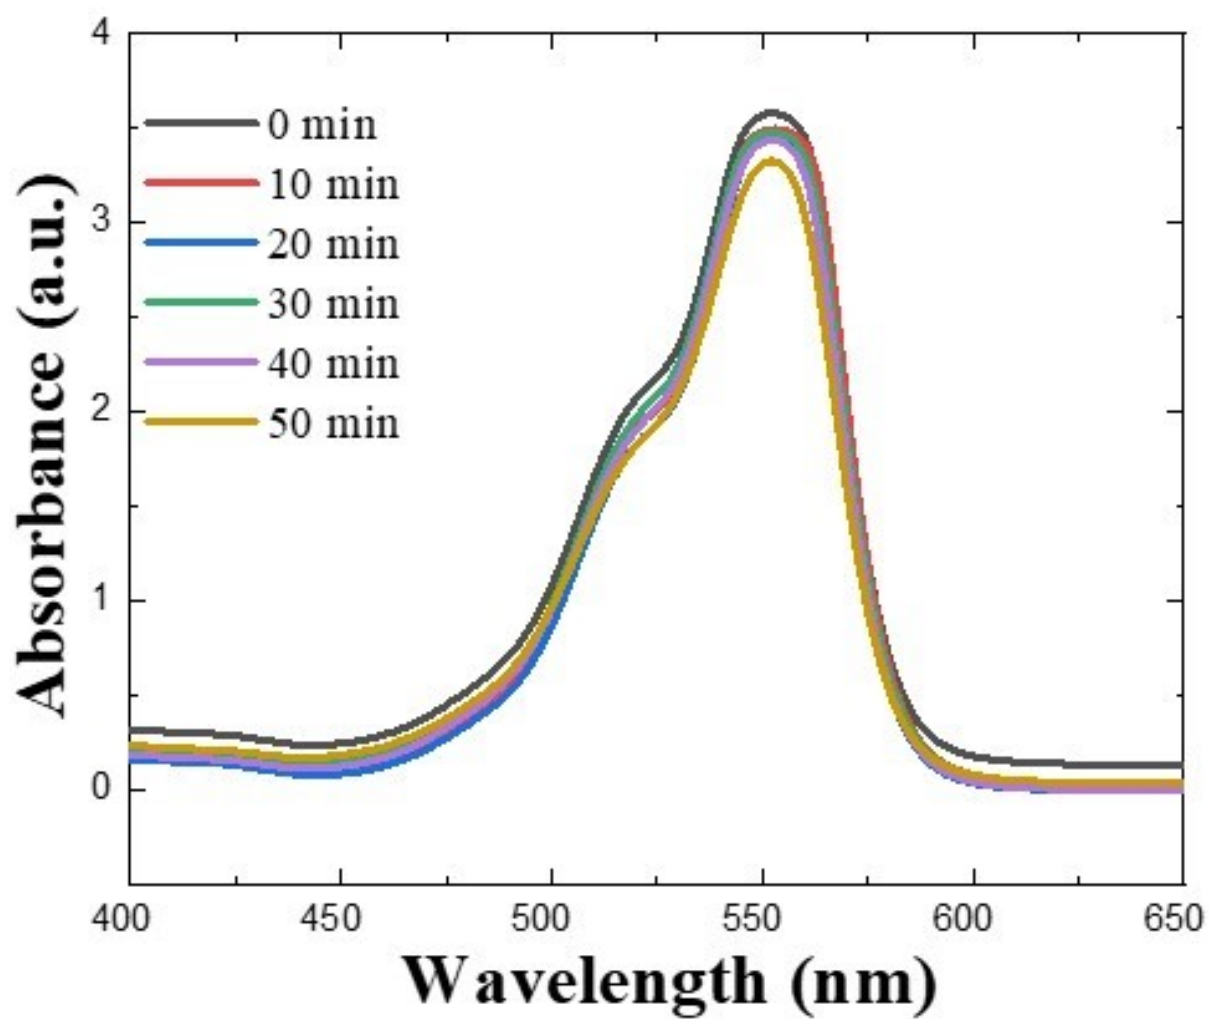

Fig.S3. UV-VIS Absorbance spectra of Rhodamine B dye without catalyst under visible irradiation such that after 50 minutes the degradation is around 5%.

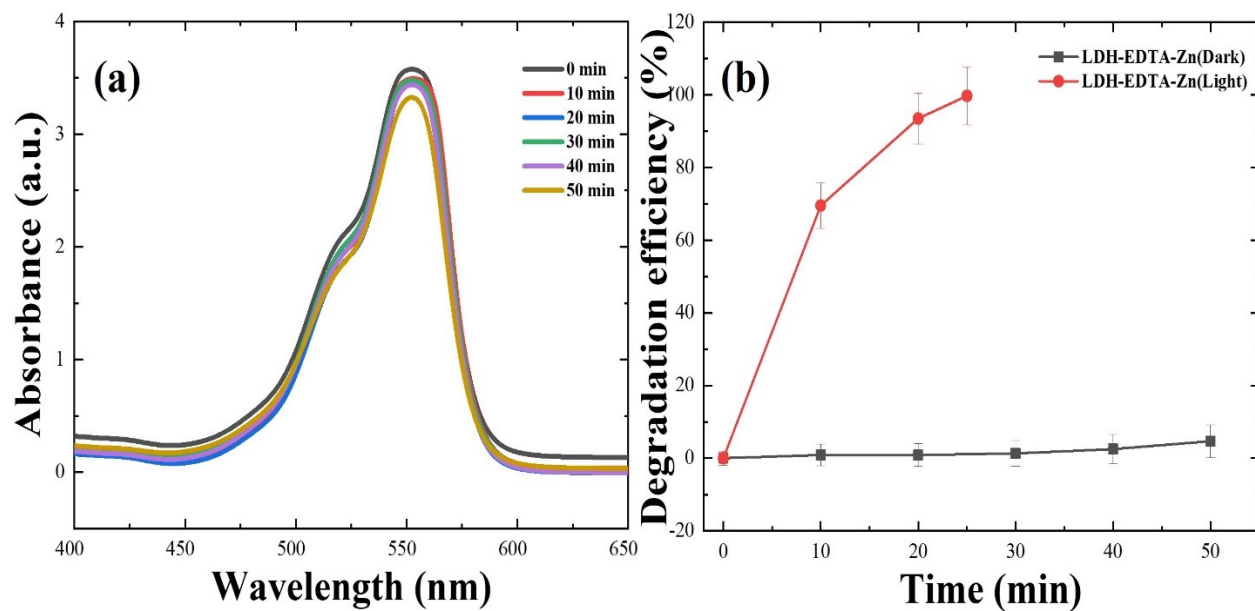

Fig.S4. (a). UV-VIS absorbance spectra of Rhodamine B dye for LDH-EDTA-Zn catalyst under dark conditions. (b). The Photocatalytic degradation of Rhodamine b for LDH-EDTA-Zn sample under light and dark conditions such that it degraded 99.7% within 25 minutes while under dark conditions it degraded only 4 %.

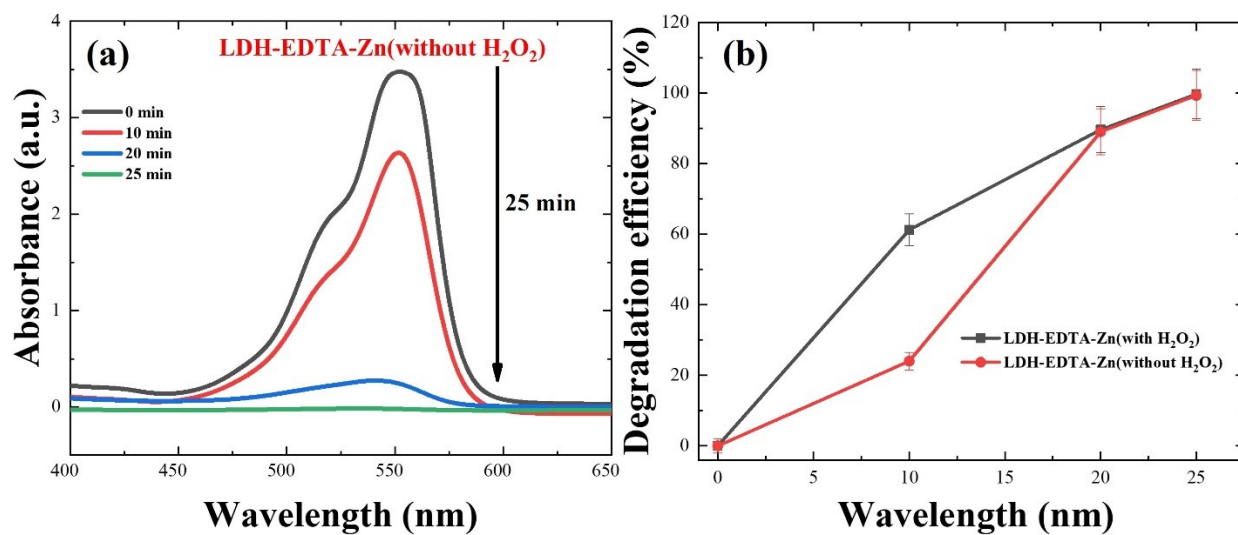

Fig.S5.(a). UV-VIS absorbance spectra of Rhodamine B for LDH-EDTA-Zn catalyst in the absence of  $H_2O_2$ . (b). The photocatalytic degradation efficiencies of LDH-EDTA-Zn with and without the addition of  $H_2O_2$ .

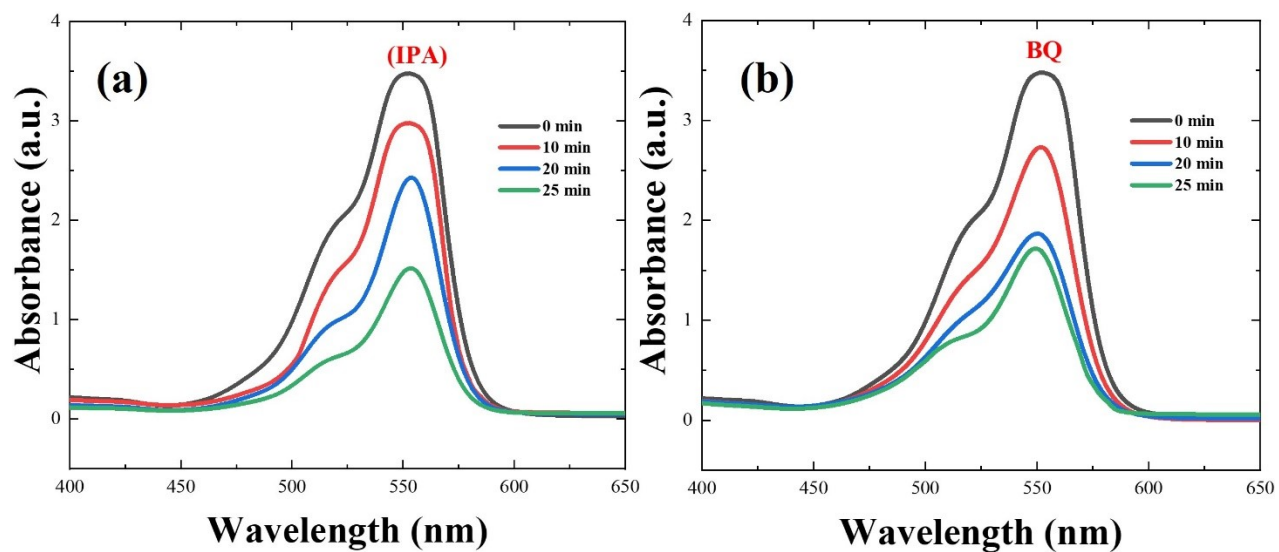

Fig.S6.(a,b). UV-VIS absorbance spectra of Rhodamine B For LDH-EDTA-Zn by adding scavengers IPA and BQ for trapping of active radicals species respectively.

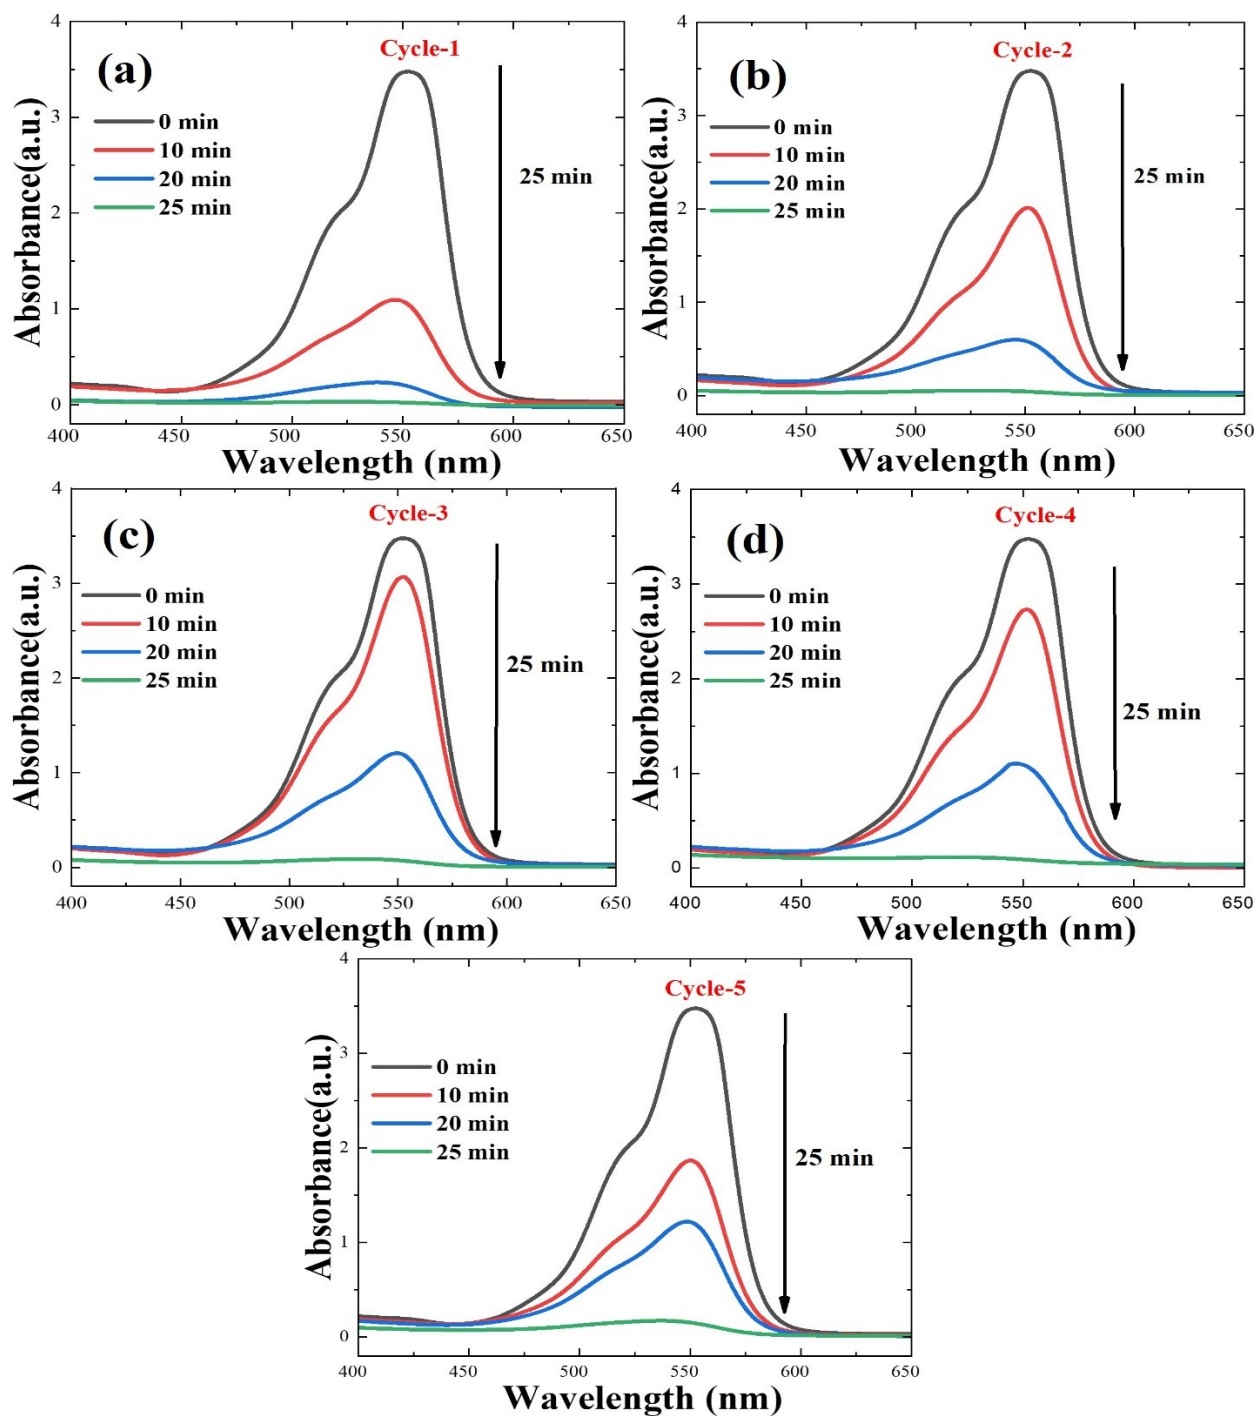

Fig.S7.(a-e). UV-VIS absorbance spectra representing the photocatalytic activity of LDH-EDTA-Zn for degradation of RhB dye up to five cycles, respectively.



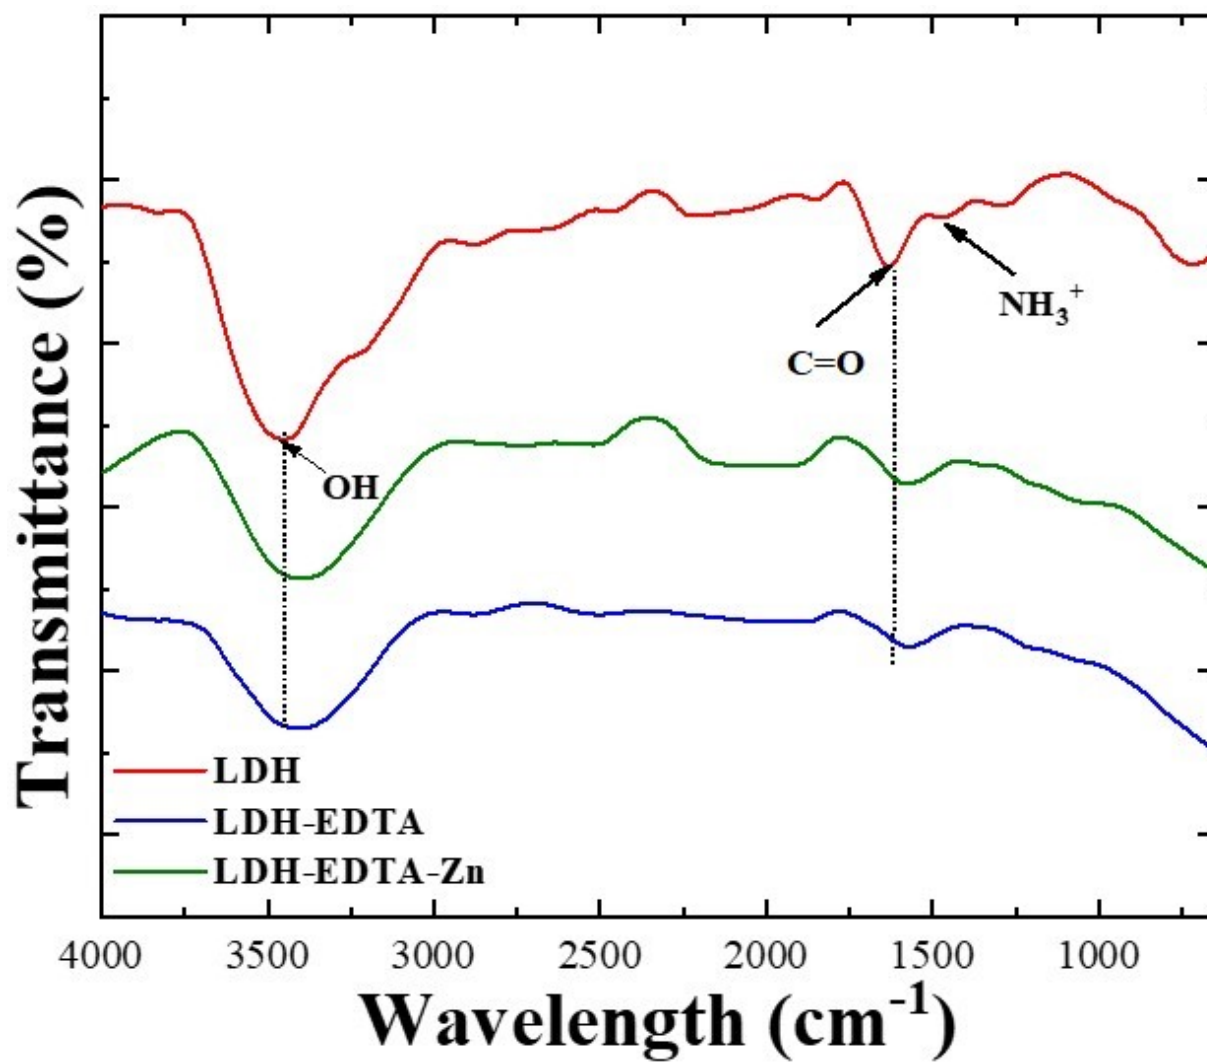

S8. The FTIR spectra for LDH, LDH, EDTA, and LDH-EDTA-Zn after photocatalysis with the wavelength range of 4000-650 cm<sup>-1</sup>.
